# Supplementary material for: Repeated stimulation of the pituitary–adrenal axis alters offspring phenotype of a wild passerine
Source: Oxford University Press journal article supplement (doi:10.1242/jeb.200659), 2019-01-01

**Figure S1.** The identification of wing flaps of nestlings and control sounds (the common chaffinch *Fringilla coelebs*) from a sonogram (frame length is about 6 s). Wing flaps produce a specific pattern because of high variation in frequency. The amplitude (the maximum absolute value of the signal or the loudness of sound) is the difference from the zero reference value.

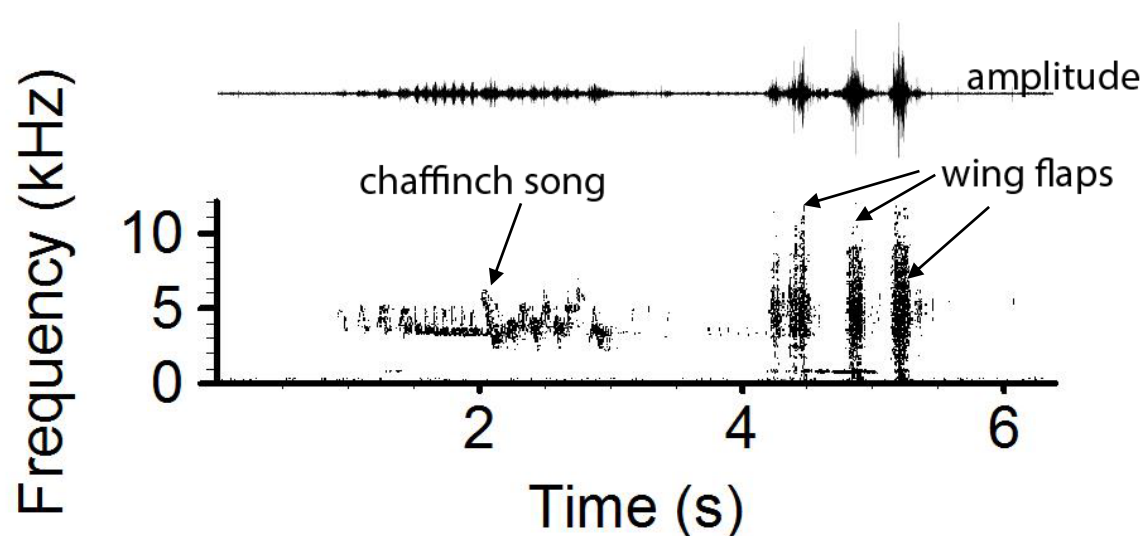

**Figure S2.** The identification of wing flaps and the playback sounds (nestling alarm calls) from a sonogram (frame length is about 6 s).

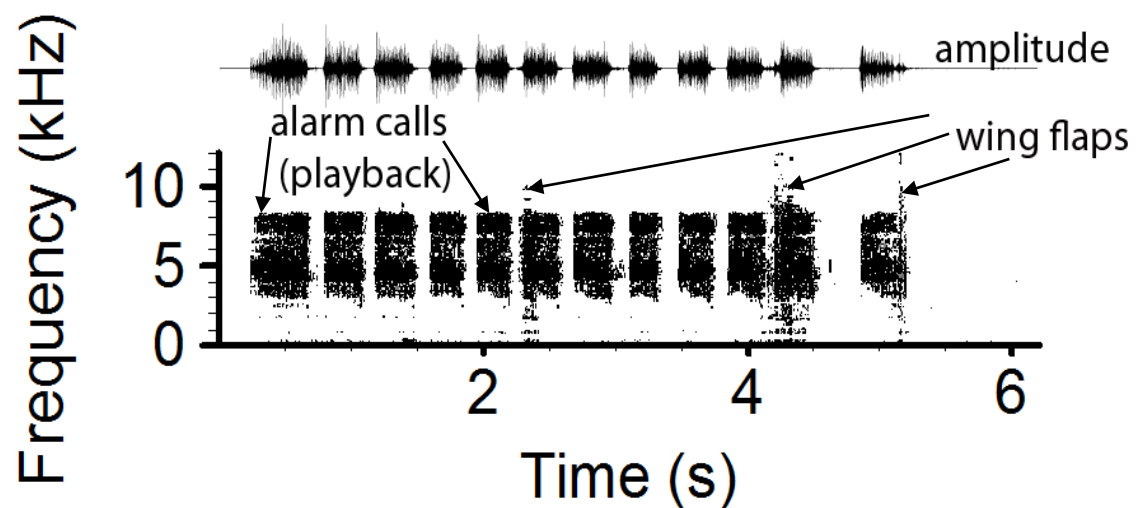

Supplement: jeb200659supp.pdf [file jeb200659supp.pdf]
